# Supplementary material for: Antimicrobial Effects and Antioxidant Activity of Myrtus communis L. Essential Oil in Beef Stored under Different Packaging Conditions
Source: MDPI journal article supplement (doi:10.3390/foods12183390), 2023-09-10
Supplement: s1 [file s1]

Table S1. Volatile compounds of *Myrtus Communis* L. Essential oil determined by GC-MS.

| RT<br>(min) | KI   | Compounds                                                                 | Quantity<br>(%) |
|-------------|------|---------------------------------------------------------------------------|-----------------|
| 7.40        | 851  | 2-Hexenal                                                                 | 0.7             |
| 8.25        | 900  | Nonane                                                                    | 0.3             |
| 8.49        | 902  | Propanoic acid, 2-methyl-, 2-methylpropyl ester                           | 1.8             |
| 9.10        | 940  | $\alpha$ -Pinene                                                          | 4.4             |
| 10.03       | 981  | $\beta$ -Myrcene                                                          | 0.8             |
| 10.22       | 991  | Isobutyl 2-methylbutanoate                                                | 0.3             |
| 10.46       | 1003 | Propanoic acid, 2-methyl-, butyl ester                                    | 0.7             |
| 10.92       | 1030 | Limonene                                                                  | 6.2             |
| 11.00       | 1033 | Eucalyptol (1,8-cineole)                                                  | 9.9             |
| 12.10       | 1098 | $\beta$ -Linalool                                                         | 12.3            |
| 13.65       | 1179 | Terpinen-4-ol                                                             | 0.6             |
| 13.86       | 1191 | $\alpha$ -Terpineol                                                       | 2.7             |
| 14.00       | 1200 | Myrtenol                                                                  | 1.2             |
| 14.34       | 1229 | Nerol                                                                     | 0.5             |
| 14.72       | 1241 | Linalyl o-aminobenzoate                                                   | 5.9             |
| 15.63       | 1297 | trans-Pinocarvyl acetate                                                  | 1.2             |
| 15.87       | 1319 | 2,6-Octadienoic acid, 3,7-dimethyl-, methyl ester                         | 0.3             |
| 16.05       | 1325 | Myrtenyl acetate                                                          | 15.5            |
| 16.27       | 1339 | 2-Oxabicyclo[2.2.2]octan-6-ol, 1,3,3-trimethyl-, acetate                  | 0.3             |
| 16.37       | 1343 | $\alpha$ -terpinyl acetate                                                | 2.2             |
| 16.69       | 1383 | Geranyl acetate                                                           | 7.4             |
| 17.09       | 1401 | Methyleugenol                                                             | 1.8             |
| 17.26       | 1409 | p-Menta-1(7),8-dien-9-ol                                                  | 0.2             |
| 17.61       | 1418 | Ethyl dihydrocoumarin                                                     | 0.3             |
| 17.72       | 1427 | $\beta$ -caryophyllene                                                    | 0.4             |
| 18.11       | 1052 | 6,6-dimethylbicyclo [3.1.1] hept-2-en-2-yl, methyl-ethyl-carbonate        | 0.4             |
| 18.22       | 1447 | Humulene                                                                  | 0.9             |
| 18.93       | 1453 | 7-Isopropyl-7-methyl-nona-3,5-diene-2,8-dione                             | 1.7             |
| 19.21       | 1608 | Ethanone, 1,1'-(5-hydroxy-2,2-dimethylbicyclo[4.1.0]heptane-1,7-diyl)bis- | 0.3             |
| 20.07       | 1609 | Caryophyllene oxide                                                       | 0.7             |
| 20.40       | 1610 | Humulene-1,2-epoxide                                                      | 1.2             |

---

|              |      |                      |             |
|--------------|------|----------------------|-------------|
| 20.67        | 1631 | Diepicedrene-1-oxide | 0.3         |
| <b>Total</b> |      |                      | <b>83.3</b> |

---

RT- Retention time; KI- Kovats index
